# Supplementary material
Source: publisher figshare collection journal article supplement (https://sage.figshare.com/ndownloader/files/13058711)
Supplement: Supplementary file 1 [file 13058711]

Supplementary Table 2.

*Analysis of variance results for the attentional bias analysis from the spatial cueing task data*

| Source of Variance | *F* | *df* | *p* | ηp2 |
| --- | --- | --- | --- | --- |
| Group | 0.224 | 1, 35 | .639 | .006 |
| Stimuli type | 0.732 | 1, 35 | .398 | .020 |
| Presentation time | 1.604 | 1, 35 | .214 | .044 |
| Group x Stimuli type | 0.083 | 1, 35 | .776 | .002 |
| Group x Presentation time | 0.375 | 1, 35 | .544 | .011 |
| Stimuli type x Presentation time | < 0.001 | 1, 35 | .990 | < .001 |
| Group x Stimuli type x Presentation time | 2.617 | 1, 35 | .115 | .070 |
